# Supplementary material
Source: PubMed Central journal article supplement (PMC1415303)

Legends to Supplementary figures:

**Supplementary figure 1:** *Survivin 89-142 and Survivin C84A fail to localize to centromeres but do localize to midzone and midbody.* U2OS cells were grown on glass coverslips and co-transfected with Survivin siRNA, plasmids expressing VSV-tagged versions of the indicated Survivin proteins and with H2B-GFP to visualize the DNA. Cells were fixed in paraformaldehyde 14 hrs after release from a thymidine block. The exogenously expressed proteins were detected with mouse anti-VSV mAb (columns labeled “VSV”). Localization of VSV-tagged Survivin<sub>1-142</sub> (A), Survivin<sub>89-142</sub> (B) and Survivin<sub>C84A</sub> (C) in prometaphase, anaphase and telophase. The abnormal anaphases (B, lagging chromosomes) are a reflection of the failure of the Survivin<sub>89-142</sub> mutant to reconstitute Survivin function at the centromere.

**Supplementary figure 2:** *Phosphorylation of the Aurora B substrate CENP-A is impaired in Survivin-depleted and Survivin<sub>1-89</sub>, Survivin<sub>89-142</sub> and Survivin<sub>C84A</sub> reconstituted cells.* U2OS cells were grown on glass coverslips and co-transfected with Survivin siRNA, plasmids expressing the indicated Survivin proteins and with H2B-GFP to visualize the DNA. Cells were fixed in paraformaldehyde 14 hrs after release from a thymidine block. (A) Phosphorylated CENP-A and total CENP-A were detected with specific antibodies and per cell the intensity values of 20 kinetochores were determined. Per kinetochore the pixel intensity of phosphorylated CENP-A (pCA) was divided by the pixel intensity of total CENP-A (CA). Cells designated as bright the pCA/CA pixel intensities ranged from 1.13-1.58, weak ranged from 0.30-0.63 and cells scored as negative ranged from 0.01-0.09. (B) Percentages of H2B-GFP positive prometaphases with bright, weak or neg pCA/CA intensity levels. (C) In contrast to Aurora B localization, Aurora A localization is not affected by Survivin depletion. The reduced phosphorylation of CENP-A in Survivin knock-down is therefore not due to lack of Aurora A.

**Supplementary figure 3:** *Expression and localization of Borealin deletion mutants in Borealin/Dasra B depleted cells.* (A) Western blot of whole cell extracts (WCE) of U2OS cells co-transfected with Borealin siRNA and VSV-tagged full-length Borealin (1-280) and Borealin N-terminal (142-280) and C-terminal (1-141) deletion mutants. Blots were probed with anti-VSV mAb. (\*\*) indicates a background band. (B) Localization of exogenously expressed VSV-tagged full-length Borealin and its deletion mutants in the absence of endogenous Borealin (Borealin siRNA). The exogenous proteins were detected with an anti-VSV mAb.

Lens et al.  
Supplementary figure 1

A

surv 1-142

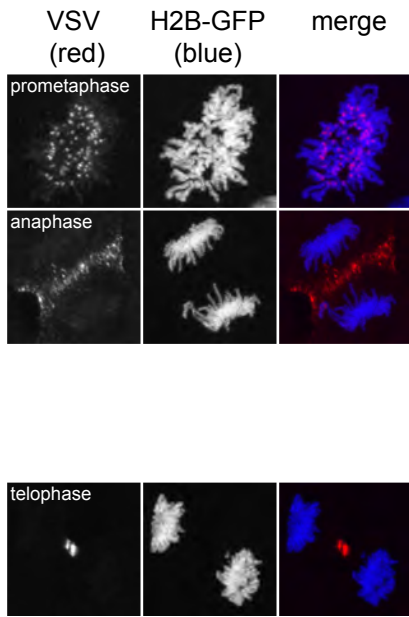

B

surv 89-142

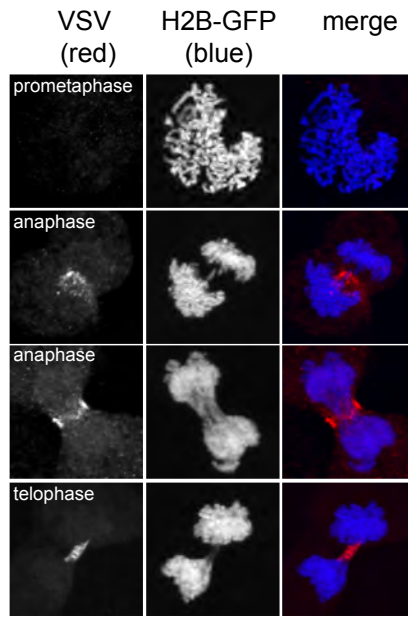

C

surv C84A

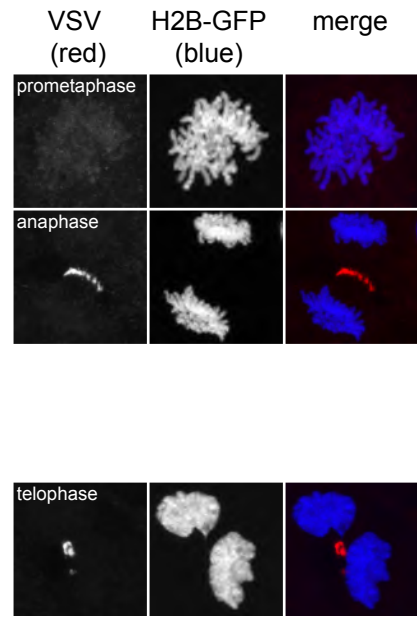

**A**

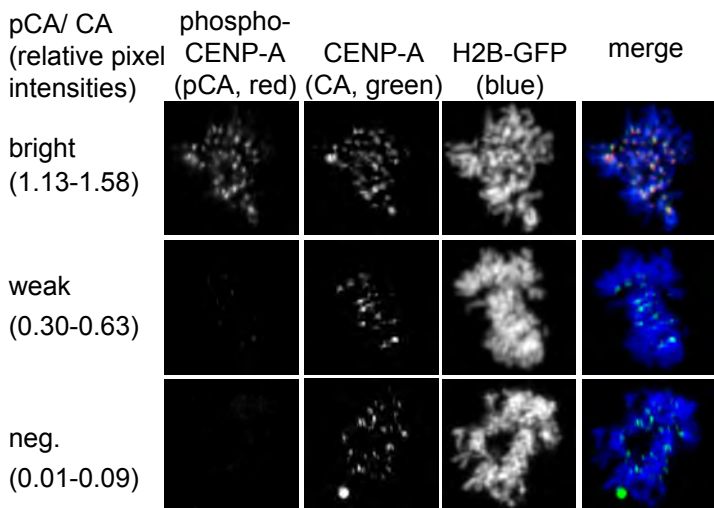

**B**

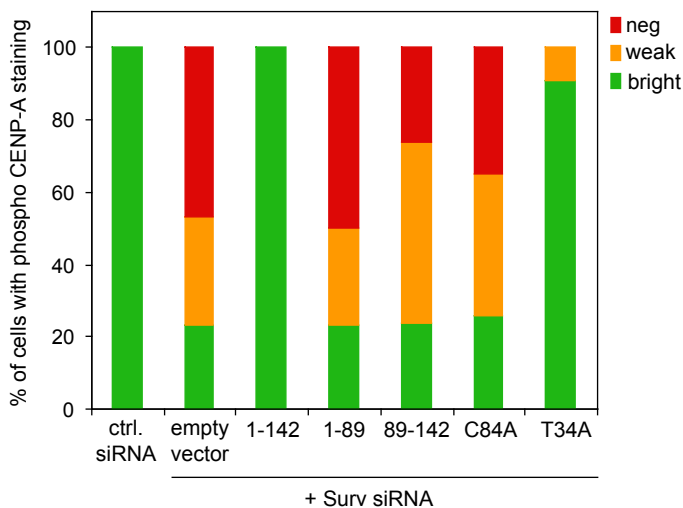

**C**

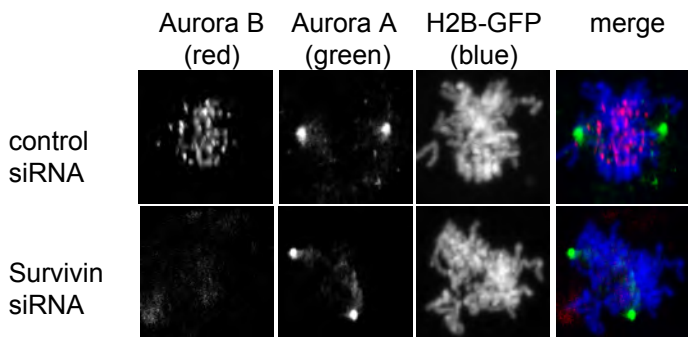

Lens et al.  
Supplementary figure 3

A

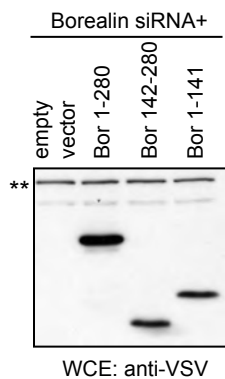

B

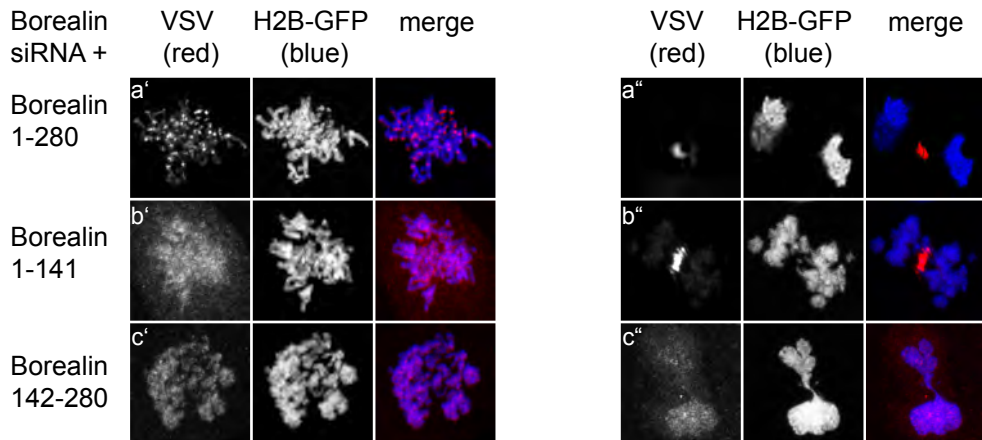

Supplement: mbc_E05-08-0727_1.pdf [file mbc_E05-08-0727_1.pdf]
